# Supplementary material for: Sustainable synthesis of titanium based photocatalysts via surfactant templating: from kerosene to sunflower oil
Source: Royal Society of Chemistry journal article supplement (doi:10.1039/d3ma00957b), 2024-01-01
Supplement: d3ma00957b3.xlsx [file d3ma00957b3.xlsx]

## Sheet: Photocatalysis
V
Time (minutes)	Absorbance	Concentration (mg/L)	C/C0	C/C-30	Deviation	C/C0 Deviation													% uncertainty	Cumlative % uncertainty	Total uncertainty
-30	0.8645	5.08784	N/A	1	0.0015
0	0.753	4.43163	1	0.871024	0.01	0.0141421													1	1.41421	0.0141421
15	0.7415	4.36395	0.984728	0.857721	0.0145	0.0175277													1.47249	1.77995	0.0175277
30	0.717	4.21976	0.952191	0.829381	0.014	0.0169312													1.47029	1.77813	0.0169312
45	0.6855	4.03437	0.910359	0.792944	0.0225	0.0242719													2.47155	2.66619	0.0242719
60	0.664	3.90784	0.881806	0.768074	0.028	0.0293557													3.1753	3.32904	0.0293557
90	0.6165	3.62829	0.818725	0.713129	0.0315	0.0325466													3.84745	3.97528	0.0325466
120	0.578	3.4017	0.767596	0.668595	0.031	0.0319362													4.03858	4.16055	0.0319362
150	0.5225	3.07507	0.693891	0.604396	0.0465	0.0470149													6.70134	6.77554	0.0470149
180	0.4735	2.78669	0.628818	0.547715	0.0595	0.0598314													9.4622	9.51489	0.0598314
VT80
Time (minutes)	Absorbance	Concentration (mg/L)	C/C0	C/C-30	Deviation	C/C0 Deviation													% uncertainty	Cumlative % uncertainty	Total uncertainty
-30	0.8665	5.20689	N/A	1	0.0045	N/A
0	0.181	1.08765	1	0.208886	0.006	0.00848528													0.6	0.848528	0.00848528
15	0.133	0.79921	0.734807	0.153491	0.007	0.00827272													0.952632	1.12584	0.00827272
30	0.1	0.60091	0.552486	0.115407	0.014	0.0143871													2.534	2.60407	0.0143871
45	0.0835	0.50176	0.461326	0.0963647	0.0125	0.0128028													2.70958	2.77522	0.0128028
60	0.0755	0.453687	0.417127	0.0871321	0.0015	0.00291785													0.359603	0.69951	0.00291785
90	0.0655	0.393596	0.361878	0.0755915	0.0025	0.00331126													0.69084	0.915019	0.00331126
120	0.058	0.348528	0.320442	0.0669359	0.006	0.00630052													1.87241	1.9662	0.00630052
150	0.0595	0.357541	0.328729	0.0686671	0.0025	0.00318438													0.760504	0.968693	0.00318438
180	0.0615	0.36956	0.339779	0.0709752	0.0005	0.00209909													0.147154	0.617782	0.00209909

## Sheet: Kinetics
V
Time (minutes)	Concentration (mg/L)	Ln(Conc)
-30	5.08784	1.62685
0	4.43163	1.48877
15	4.36395	1.47338
30	4.21976	1.43978
45	4.03437	1.39485
60	3.90784	1.36298
90	3.62829	1.28876
120	3.4017	1.22428
150	3.07507	1.12333
180	2.78669	1.02485
VT80
Time (minutes)	Concentration (mg/L)	Ln(Conc)
-30	5.20689	1.64998
0	1.08765	0.0840167
15	0.79921	-0.224131
30	0.60091	-0.50931
45	0.50176	-0.689634
60	0.453687	-0.790348
90	0.393596	-0.93243
120	0.348528	-1.05404
150	0.357541	-1.0285
180	0.36956	-0.995443
