# Supplementary material for: Sustainable synthesis of titanium based photocatalysts via surfactant templating: from kerosene to sunflower oil
Source: Royal Society of Chemistry journal article supplement (doi:10.1039/d3ma00957b), 2024-01-01
Supplement: d3ma00957b6.xlsx [file d3ma00957b6.xlsx]

## Sheet: Photocatalysis
KS80
Time (minutes)	Absorbance	Concentration (mg/L)	C/C0	C/C-30	Deviation		% uncertainty	Cumlative % uncertainty	Total uncertainty
-30	0.967	4.95046	N/A	1	0.002
0	0.569	2.91294	1	0.588418	0.039		3.9	5.51543	0.0551543
15	0.451	2.30885	0.792619	0.466391	0.026		3.28027	5.09609	0.0403926
30	0.369	1.88906	0.648506	0.381593	0.026		4.00921	5.59319	0.0362722
45	0.309	1.58189	0.543058	0.319545	0.021		3.86699	5.49214	0.0298255
60	0.2635	1.34896	0.463093	0.272492	0.0115		2.4833	4.6235	0.0214111
90	0.2035	1.0418	0.357645	0.210445	0.0015		0.41941	3.92249	0.0140286
120	0.162	0.829343	0.28471	0.167528	0.002		0.702469	3.96276	0.0112824
150	0.129	0.660403	0.226714	0.133402	0.005		2.20543	4.48039	0.0101577
180	0.056	0.286686	0.0984183	0.0579111	0.0035		3.55625	5.27796	0.00519448
S
Time (minutes)	Absorbance	Concentration (mg/L)	C/C0	C/C-30	Deviation		% uncertainty	Cumlative % uncertainty	Total uncertainty
-30	0.85	5.10773	N/A	1	0
0	0.2685	1.61344	1	0.315882	0.0095		0.95	1.3435	0.013435
15	0.147	0.883338	0.547486	0.172941	0.021		3.83571	3.95161	0.0216345
30	0.0745	0.447678	0.277467	0.0876471	0.0085		3.06342	3.20734	0.00889934
45	0.0445	0.267405	0.165736	0.0523529	0.0025		1.50843	1.78265	0.00295449
60	0.033	0.1983	0.122905	0.0388235	0.003		2.44091	2.61926	0.00321921
90	0.02	0.120182	0.0744879	0.0235294	0.005		6.7125	6.77939	0.00504983
120	0.012	0.0721092	0.0446927	0.0141176	0.007		15.6625	15.6913	0.00701286
150	0.009	0.0540819	0.0335196	0.0105882	0.01		29.8333	29.8485	0.0100051
180	0.007	0.0420637	0.0260708	0.00823529	0.008		30.6857	30.7004	0.00800383
ST80
Time (minutes)	Absorbance	Concentration (mg/L)	C/C0	C/C-30	Deviation		% uncertainty	Cumlative % uncertainty	Total uncertainty
-30	0.847	5.08971	N/A	1	0.001
0	0.049	0.294446	1	0.0578512	0.008		0.8	1.13137	0.0113137
15	0.0285	0.171259	0.581633	0.0336482	0.0015		0.257895	0.840541	0.00488886
30	0.0225	0.135205	0.459184	0.0265643	0.0005		0.108889	0.807376	0.00370734
45	0.019	0.114173	0.387755	0.0224321	0.002		0.515789	0.951861	0.00369089
60	0.015	0.0901365	0.306122	0.0177096	0.001		0.326667	0.864124	0.00264528
90	0.013	0.0781183	0.265306	0.0153483	0.001		0.376923	0.884348	0.00234623
120	0.013	0.0781183	0.265306	0.0153483	0.001		0.376923	0.884348	0.00234623
150	0.0105	0.0630956	0.214286	0.0123967	0.0005		0.233333	0.833333	0.00178571
180	0.0065	0.0390592	0.132653	0.00976479	0.0005		0.376923	0.884348	0.00117311

## Sheet: Quenching
KS80 IPA																		Uncertainty (SD) calculations
Time (minutes)	Absorbance	Concentration (mg/L)	C/C0	C/C-30	Deviation	C/C0 deviation													% uncertainty	Cumlative % uncertainty	Total uncertainty
-30	0.955	4.88903	N/A	1	0.0204776	N/A
0	0.4945	2.53154	1	0.517801	0.0025597	0													0.25597	0.361996	0.00361996
15	0.43	2.20134	0.869565	0.450262	0.0204776	0.00896822													2.35492	2.36879	0.0205982
30	0.387	1.98121	0.782609	0.405236	0.0102388	0.00325318													1.30829	1.3331	0.0104329
45	0.335	1.715	0.677452	0.350785	0.0204776	0.007404													3.02274	3.03356	0.0205509
60	0.2805	1.43599	0.56724	0.293717	0.0076791	0.00245982													1.35377	1.37775	0.00781516
90	0.188	0.962447	0.380182	0.196859	0.0153582	0.00568233													4.0397	4.0478	0.015389
120	0.117	0.59897	0.236603	0.122513	0.0153582	0.00582751													6.49114	6.49618	0.0153701
150	0.0685	0.350679	0.138524	0.0717277	0.0025597	0.00115119													1.84784	1.86549	0.00258414
180	0.036	0.184298	0.0728008	0.0376963	0.0051194	0.00194864													7.03206	7.03672	0.00512279
KS80 PBQ																		Uncertainty (SD) calculations
Time (minutes)	Absorbance	Concentration (mg/L)	C/C0	C/C-30	Deviation	C/C0 deviation													% uncertainty	Cumlative % uncertainty	Total uncertainty
-30	0.9365	4.79432	N/A	1	0.0281567	N/A
0	0.3985	2.04008	1	0.425521	0.0127985	0													1.27985	1.80998	0.0180998
15	0.3535	1.80971	0.887077	0.377469	0.0025597	0.00431056													0.288555	1.31198	0.0116382
30	0.2955	1.51278	0.741531	0.315537	0.0025597	0.00590695													0.345191	1.32558	0.00982961
45	0.2535	1.29777	0.636136	0.270689	0.0076791	0.000226706													1.20715	1.75932	0.0111917
60	0.2075	1.06228	0.520703	0.22157	0.0076791	0.000497494													1.47476	1.95267	0.0101676
90	0.1485	0.760231	0.372647	0.158569	0.0179179	0.00644538													4.80827	4.97569	0.0185418
120	0.0935	0.478664	0.23463	0.0998398	0.0025597	0.00021726													1.09095	1.68172	0.00394582
150	0.063	0.322522	0.158093	0.0672718	0.0051194	0.00350135													3.23822	3.48197	0.00550474
180	0.0525	0.268769	0.131744	0.0560598	0.0281567	0.0129758													21.3723	21.4106	0.0282071
S IPA																		Uncertainty (SD) calculations
Time (minutes)	Absorbance	Concentration (mg/L)	C/C0	C/C-30	Deviation	C/C0 deviation													% uncertainty	Cumlative % uncertainty	Total uncertainty
-30	0.9625	4.92742	N/A	1	0.0332761	N/A
0	0.6715	3.43768	1	0.697662	0.0588731	0													5.88731	8.32591	0.0832591
15	0.636	3.25594	0.947133	0.660779	0.0102388	0.0192045													1.08103	5.98574	0.0566929
30	0.583	2.98461	0.868206	0.605714	0.0051194	0.0163627													0.589653	5.91677	0.0513697
45	0.5155	2.63905	0.767684	0.535584	0.0127985	0.0168752													1.66716	6.11881	0.0469731
60	0.458	2.34469	0.682055	0.475844	0	0.0116842													0	5.88731	0.0401547
90	0.357	1.82763	0.531646	0.370909	0.0051194	0.00761791													0.962935	5.96554	0.0317155
120	0.2665	1.36432	0.396873	0.276883	0.0076791	0.00903323													1.9349	6.19712	0.0245947
150	0.1855	0.949649	0.276247	0.192727	0.0025597	0.00547717													0.926598	5.95978	0.0164637
180	0.13	0.665522	0.193596	0.135065	0.0051194	0.00480611													2.64437	6.45392	0.0124946
S PBQ																		Uncertainty (SD) calculations
Time (minutes)	Absorbance	Concentration (mg/L)	C/C0	C/C-30	Deviation	C/C0 deviation													% uncertainty	Cumlative % uncertainty	Total uncertainty
-30	0.9365	4.79432	N/A	1	0.0332761	N/A
0	0.576	2.94877	1	0.615056	0.0409552	0													4.09552	5.79194	0.0579194
15	0.5285	2.7056	0.917535	0.564335	0.0025597	0.0136142													0.278976	4.10501	0.0376649
30	0.448	2.29349	0.777778	0.478377	0.0051194	0.012541													0.658209	4.14807	0.0322628
45	0.3645	1.86602	0.632812	0.389215	0.0025597	0.00965898													0.404496	4.11545	0.0260431
60	0.301	1.54094	0.522569	0.32141	0.0051194	0.00899576													0.979659	4.21106	0.0220057
90	0.1885	0.965007	0.327257	0.201281	0.0179179	0.0106237													5.47518	6.83746	0.0223761
120	0.105	0.537537	0.182292	0.11212	0.0153582	0.00774166													8.42507	9.36777	0.0170767
150	0.0615	0.314843	0.106771	0.06567	0.0025597	0.000614991													2.39738	4.7456	0.00506691
180	0.0385	0.197097	0.0668403	0.0411105	0.0025597	0.00179674													3.82958	5.60704	0.00374776
ST80 IPA																		Uncertainty (SD) calculations
Time (minutes)	Absorbance	Concentration (mg/L)	C/C0	C/C-30	Deviation	C/C0 deviation													% uncertainty	Cumlative % uncertainty	Total uncertainty
-30	0.959	4.9095	N/A	1	0.0358358	N/A
0	0.219	1.12115	1	0.228363	0.0460746	0													4.60746	6.51593	0.0651593
15	0.1095	0.560574	0.5	0.114181	0.0025597	0.0228697													0.51194	4.63581	0.0231791
30	0.0565	0.289246	0.257991	0.0589155	0.0025597	0.00833333													0.992167	4.71308	0.0121593
45	0.036	0.184298	0.164384	0.0375391	0.0102388	0.00238095													6.2286	7.74753	0.0127357
60	0.0275	0.140784	0.125571	0.0286757	0.0025597	0.00745614													2.03845	5.03825	0.00632657
90	0.04	0.204776	0.182648	0.0417101	0.051194	0.0532581													28.0287	28.4049	0.0518811
120	0.0305	0.156142	0.139269	0.031804	0.0179179	0.0217419													12.8656	13.6658	0.0190322
150	0.031	0.158701	0.141553	0.0323253	0.0051194	0.010401													3.61661	5.85735	0.00829123
180	0.029	0.148463	0.13242	0.0302398	0.0153582	0.0191729													11.5981	12.4798	0.0165257
Time (minutes)	Absorbance	Concentration (mg/L)	C/C0	C/C-30	Deviation	C/C0 deviation													% uncertainty	Cumlative % uncertainty	Total uncertainty
-30	0.973	4.98118	N/A	1	0.0358358	N/A
0	0.268	1.372	1	0.275437	0.0614328	0													6.14328	8.68791	0.0868791
15	0.136	0.696238	0.507463	0.139774	0.0460746	0.0564174													9.07941	10.9625	0.0556304
30	0.0695	0.355798	0.259328	0.0714286	0.0076791	0.0172433													2.96115	6.8197	0.0176854
45	0.057	0.291806	0.212687	0.0585817	0.0153582	0.00167411													7.22105	9.48069	0.0201641
60	0.05	0.25597	0.186567	0.0513875	0.0102388	0.0158482													5.488	8.2376	0.0153687
90	0.0425	0.217574	0.158582	0.0436793	0.0281567	0.0134487													17.7553	18.788	0.0297944
120	0.037	0.189418	0.13806	0.0380267	0	0.0061942													0	6.14328	0.00848139
150	0.035	0.179179	0.130597	0.0359712	0.0051194	0.00212054													3.92	7.2874	0.00951713
180	0.034	0.17406	0.126866	0.0349435	0.0102388	0.0131696													8.07058	10.1427	0.0128676

## Sheet: Kinetics
KS80
Time	Concentration (mg/L)	Ln(Conc)				Conc vs Time	Rate constant
-30	4.95046	1.59948				-30 to 180	0.01
0	2.91294	1.06916				-30 -0	0.018
15	2.30885	0.836749				0-30	0.014
30	1.88906	0.636079				0-60	0.013
45	1.58189	0.458623				0-90	0.011
60	1.34896	0.299335				0-180	0.009
90	1.0418	0.040948
120	0.829343	-0.187122
150	0.660403	-0.414906
180	0.581052	-0.542915
S
Time	Concentration (mg/L)	Ln(Conc)				Conc vs Time	Rate constant
-30	5.10773	1.63076				-30 to 180	0.022
0	1.61344	0.478371				30 -0	0.038
15	0.883338	-0.124048				0-30	0.043
30	0.447678	-0.803681				0-60	0.036
45	0.267405	-1.31899				0-90	0.029
60	0.1983	-1.61797				0-180	0.019
90	0.120182	-2.11875
120	0.0721092	-2.62957
150	0.0540819	-2.91726
180	0.0420637	-3.16857
ST80
Time	Concentration (mg/L)	Ln(conc)				Conc vs Time	Rate constant
-30	5.08971	1.62722				-30 to 180	0.016
0	0.294446	-1.22266				-30 -0	0.095
15	0.171259	-1.76458				0-30	0.026
30	0.135205	-2.00096				0-60	0.019
45	0.114173	-2.17004				0-90	0.014
60	0.0901365	-2.40643				0-180	0.009
90	0.0781183	-2.54953
120	0.0781183	-2.54953
150	0.0630956	-2.76311
180	0.0390592	-3.24268

## Sheet: Recycling
Concentration (mg/L)								Errors
Time (mins)	Cycle 1	Cycle 2	Cycle 3	Cycle 4		Cycle 1	Cycle 2	Cycle 3	Cycle 4
-30	4.95302	5.081	4.95302	5.1322		0.0127985	0.0639925	0.0127985	0.0127985
0	1.11603	1.79947	1.11603	2.15783		0.225254	0.0588731	0.225254	0.145903
15	0.834462	1.38224	0.834462	1.81995		0.0972686	0.025597	0.0972686	0.0179179
30	0.552895	0.93429	0.552895	1.49742		0.025597	0.0179179	0.025597	0.0025597
45	0.404433	0.693679	0.404433	1.22354		0.025597	0.0025597	0.025597	0
60	0.276448	0.563134	0.276448	0.990604		0.051194	0.0102388	0.051194	0.0127985
90	0.189418	0.389074	0.189418	0.665522		0.0153582	0.0051194	0.0153582	0.0051194
120	0.127985	0.243171	0.127985	0.414671		0.0102388	0.0076791	0.0102388	0.0153582
150	0.0921492	0.158701	0.0921492	0.276448		0	0.0051194	0	0.0051194
180	0.127985	0.130545	0.127985	0.220134		0	0.0179179	0	0.0102388
C/C0						Errors
Time (mins)	Cycle 1	Cycle 2	Cycle 3	Cycle 4		Cycle 1	Cycle 2	Cycle 3	Cycle 4
0	1	1	1	1		0	0	0	0
15	0.747706	0.768137	0.747706	0.843416		0.0664649	0.010918	0.0664649	0.0489483
30	0.495413	0.519203	0.495413	0.69395		0.0803282	0.00703695	0.0803282	0.0483291
45	0.362385	0.385491	0.362385	0.567023		0.0523383	0.0140496	0.0523383	0.0385157
60	0.247706	0.312945	0.247706	0.459075		0.00429938	0.00455356	0.00429938	0.0371416
90	0.169725	0.216216	0.169725	0.308422		0.0213653	0.00423351	0.0213653	0.0233333
120	0.114679	0.135135	0.114679	0.192171		0.0145652	0.000153946	0.0145652	0.0202036
150	0.0825688	0.0881935	0.0825688	0.128114		0.017373	4.05121e-05	0.017373	0.0110857
180	0.114679	0.0725462	0.114679	0.102017		0.0241292	0.012344	0.0241292	0.00216285
